# Supplementary material for: Detection of Alpha- and Betacoronaviruses in Small Mammals in Western Yunnan Province, China
Source: MDPI journal article supplement (doi:10.3390/v15091965), 2023-09-20
Supplement: s1 [file s1]

**Table S1.** Partial RdRp nucleotide and amino acid sequence identity alignment of  $\beta$ -CoV \*.

|                  | CoV<br>L55 | CoV<br>L75 | CoV<br>L140 | CoV<br>L161 | CoV<br>L172 | CoV<br>NJ16 | CoV<br>NJ21 | CoV<br>NJ33 | CoV<br>NJ53 | CoV<br>NJ55 | CoV<br>NJ56 | CoV<br>NJ99 | CoV<br>J142 | Lijian<br>g-41 | Ruili-8<br>74 | RtAp-CoV/<br>SAX2015 | Lijian<br>g-53 | BOV-36/IN<br>D/2015 | DcCoV-H<br>KU23 |
|------------------|------------|------------|-------------|-------------|-------------|-------------|-------------|-------------|-------------|-------------|-------------|-------------|-------------|----------------|---------------|----------------------|----------------|---------------------|-----------------|
| CoV L55          |            | 99.40      | 99.35       | 99.57       | 98.89       | 99.28       | 100.00      | 97.14       | 100.00      | 100.00      | 94.66       | 91.43       | 90.14       | 97.54          | 96.86         | 53.08                | 99.80          | 49.36               | 49.36           |
| CoV L75          | 98.55      |            | 99.14       | 98.92       | 98.52       | 99.28       | 100.00      | 97.14       | 100.00      | 100.00      | 94.66       | 91.43       | 90.14       | 97.34          | 96.65         | 53.08                | 99.60          | 49.36               | 49.36           |
| CoV L140         | 96.56      | 96.77      |             | 98.92       | 98.89       | 99.28       | 100.00      | 97.14       | 100.00      | 100.00      | 94.66       | 91.43       | 90.14       | 98.92          | 99.78         | 55.87                | 99.57          | 51.95               | 51.95           |
| CoV L161         | 99.00      | 98.92      | 96.56       |             | 98.52       | 98.55       | 100.00      | 96.43       | 99.25       | 100.00      | 93.89       | 90.71       | 89.44       | 98.71          | 99.14         | 55.47                | 99.35          | 51.54               | 51.54           |
| CoV L172         | 98.65      | 98.15      | 95.33       | 97.91       |             | 97.10       | 98.72       | 94.47       | 97.74       | 98.72       | 92.37       | 90.14       | 89.29       | 98.52          | 98.89         | 74.04                | 98.89          | 68.56               | 68.56           |
| CoV NJ16         | 97.59      | 96.87      | 96.63       | 96.39       | 95.90       |             | 76.83       | 96.38       | 99.25       | 76.83       | 95.84       | 90.58       | 90.58       | 98.55          | 99.28         | 99.28                | 99.28          | 91.30               | 91.30           |
| CoV NJ21         | 98.72      | 100.00     | 98.29       | 100.00      | 98.46       | 96.92       |             | 78.66       | 78.66       | 100.00      | 75.00       | 65.85       | 62.79       | 100.00         | 100.00        | 78.66                | 100.00         | 65.85               | 65.85           |
| CoV NJ33         | 97.14      | 96.43      | 95.24       | 95.95       | 95.19       | 96.54       | 98.20       |             | 96.99       | 78.66       | 93.51       | 88.57       | 88.57       | 96.43          | 97.14         | 96.63                | 97.14          | 89.29               | 89.29           |
| CoV NJ53         | 98.75      | 97.99      | 96.99       | 97.74       | 97.24       | 97.74       | 98.20       | 98.75       |             | 78.66       | 96.62       | 90.98       | 90.98       | 99.25          | 100.00        | 100.00               | 100.00         | 91.73               | 91.73           |
| CoV NJ55         | 99.23      | 98.46      | 98.46       | 98.46       | 98.46       | 96.92       | 98.46       | 99.74       | 99.74       |             | 75.00       | 65.85       | 62.79       | 100.00         | 100.00        | 78.66                | 100.00         | 65.85               | 65.85           |
| CoV NJ56         | 96.63      | 95.87      | 95.36       | 95.62       | 95.11       | 95.25       | 98.46       | 95.68       | 96.97       | 98.46       |             | 88.05       | 88.55       | 93.89          | 94.66         | 96.62                | 94.66          | 88.83               | 88.83           |
| CoV NJ99         | 84.29      | 83.57      | 84.76       | 83.10       | 82.45       | 83.99       | 80.41       | 84.05       | 84.46       | 81.19       | 83.75       |             | 100.00      | 90.71          | 91.43         | 90.87                | 91.43          | 99.29               | 99.29           |
| CoV J142         | 83.42      | 82.73      | 84.57       | 82.51       | 82.49       | 83.86       | 66.60       | 83.81       | 84.46       | 80.77       | 82.49       | 98.57       |             | 89.44          | 90.14         | 90.43                | 90.14          | 98.82               | 98.82           |
| Lijian-g-41      | 98.35      | 98.35      | 96.63       | 98.21       | 97.17       | 96.87       | 99.15       | 96.43       | 98.25       | 98.46       | 96.12       | 83.57       | 82.96       |                | 99.14         | 99.28                | 97.75          | 91.43               | 91.43           |
| Ruili-874        | 94.19      | 94.40      | 99.57       | 96.85       | 95.69       | 96.39       | 98.72       | 95.48       | 97.24       | 99.23       | 95.62       | 85.00       | 84.80       | 94.26          |               | 100.00               | 99.78          | 92.14               | 92.14           |
| RtAp-CoV/SAX2015 | 51.86      | 51.47      | 54.34       | 54.20       | 72.85       | 98.07       | 77.73       | 96.15       | 97.99       | 98.46       | 96.29       | 84.62       | 83.65       | 97.35          | 97.35         |                      | 100.00         | 92.03               | 92.03           |
| Lijian-g-53      | 95.31      | 95.79      | 97.13       | 98.28       | 97.17       | 97.11       | 98.72       | 96.19       | 97.74       | 97.69       | 95.62       | 83.57       | 82.73       | 95.51          | 97.42         | 97.11                |                | 92.14               | 92.14           |
| BOV-36/IND/2015  | 45.13      | 44.75      | 48.32       | 47.11       | 62.71       | 84.47       | 63.41       | 83.57       | 84.71       | 81.19       | 84.01       | 98.33       | 97.34       | 84.05          | 85.95         | 85.44                | 83.57          |                     | 100.00          |
| DcCoV-HKU23      | 46.75      | 46.38      | 49.85       | 48.66       | 64.53       | 84.58       | 68.08       | 83.81       | 84.71       | 81.54       | 84.88       | 98.10       | 97.86       | 84.67          | 86.50         | 85.30                | 84.44          | 99.52               |                 |

\*The upper right is the amino acid sequence alignment result; The bottom left is the nucleotide sequence alignment result.
