# Supplementary material for: Detection of Alpha- and Betacoronaviruses in Small Mammals in Western Yunnan Province, China
Source: MDPI journal article supplement (doi:10.3390/v15091965), 2023-09-20
Supplement: s1 [file s1]

**Table S2.** Partial RdRp nucleotide and amino acid sequence identity alignment of  $\alpha$ -CoV \*.

|                   | CoVDL82 | CoVNJ3 | CoVNJ52 | CoVNJ135 | CoVNJ195 | CoVNJ196 | CoVNJ207 | RtRI-CoV/FJ2015 | RtClan-CoV/GZ2015 |
|-------------------|---------|--------|---------|----------|----------|----------|----------|-----------------|-------------------|
| CoVDL82           |         | 94.44  | 95.01   | 98.76    | 99.31    | 97.22    | 96.93    | 100.00          | 97.14             |
| CoVNJ3            | 94.00   |        | 97.26   | 93.83    | 93.75    | 93.06    | 91.98    | 94.10           | 96.93             |
| CoVNJ52           | 95.73   | 99.25  |         | 95.06    | 94.26    | 93.52    | 95.21    | 95.97           | 98.99             |
| CoVNJ135          | 99.18   | 92.56  | 93.39   |          | 97.53    | 96.30    | 97.53    | 98.76           | 96.30             |
| CoVNJ195          | 98.61   | 93.14  | 95.23   | 96.96    |          | 97.92    | 97.64    | 98.35           | 95.52             |
| CoVNJ196          | 97.69   | 93.14  | 94.97   | 96.20    | 98.85    |          | 96.93    | 97.64           | 94.81             |
| CoVNJ207          | 98.25   | 94.11  | 95.23   | 96.32    | 99.44    | 99.68    |          | 97.86           | 95.00             |
| RtRI-CoV/FJ2015   | 98.77   | 93.23  | 95.48   | 98.56    | 98.77    | 98.08    | 98.97    |                 | 97.14             |
| RtClan-CoV/GZ2015 | 95.77   | 96.23  | 98.74   | 94.68    | 94.85    | 94.15    | 94.91    | 96.08           |                   |

\*The upper right is the amino acid sequence alignment result; The bottom left is the nucleotide sequence alignment result.
