# Supplementary material for: Detection of Alpha- and Betacoronaviruses in Small Mammals in Western Yunnan Province, China
Source: MDPI journal article supplement (doi:10.3390/v15091965), 2023-09-20
Supplement: s1 [file s1]

**Table S5.** Basic information on the positive samples and reference strains obtained in this study.

|                                         | Sequence        | Type  | Location                                                                    | Collection date | Host                           | Tissue type               | Genbank accession number |
|-----------------------------------------|-----------------|-------|-----------------------------------------------------------------------------|-----------------|--------------------------------|---------------------------|--------------------------|
| positive samples obtained in this study | CoVDL55         | β-CoV | Heqing County-Dali Prefecture-Yunnan Province-China(arable areas)           | 7-Jul-21        | <i>Apodemus chevrieri</i>      | rectum                    | OR223161                 |
|                                         | CoVDL75         | β-CoV | Heqing County-Dali Prefecture-Yunnan Province-China(arable areas)           | 31-Jul-21       | <i>Apodemus chevrieri</i>      | rectum                    | OR223162                 |
|                                         | CoVDL82         | α-CoV | Dali City-Dali Prefecture-Yunnan Province-China(arable areas)               | 15-Dec-21       | <i>Rattus norvegicus</i>       | rectum                    | OR223163                 |
|                                         | CoVDL140        | β-CoV | Dali City-Dali Prefecture-Yunnan Province-China(arable areas)               | 12-Jan-22       | <i>Rattus norvegicus</i>       | rectum                    | OR223164                 |
|                                         | CoVDL161        | β-CoV | Dali City-Dali Prefecture-Yunnan Province-China(arable areas)               | 18-Jan-22       | <i>Apodemus chevrieri</i>      | rectum                    | OR223165                 |
|                                         | CoVDL172        | β-CoV | Dali City-Dali Prefecture-Yunnan Province-China(arable areas)               | 19-Jan-22       | <i>Apodemus chevrieri</i>      | rectum                    | OR223166                 |
|                                         | CoVNJ3          | α-CoV | Lushui City-Nujiang Prefecture-Yunnan Province-China(wild bush areas)       | 20-Jul-22       | <i>Eothenomys cachinus</i>     | rectum                    | OR223167                 |
|                                         | CoVNJ16         | β-CoV | Gongshan County-Nujiang Prefecture-Yunnan Province-China(wild bush areas)   | 1-Aug-22        | <i>Apodemus ilex</i>           | rectum                    | OR223168                 |
|                                         | CoVNJ21         | β-CoV | Gongshan County-Nujiang Prefecture-Yunnan Province-China(wild bush areas)   | 1-Aug-22        | <i>Apodemus ilex</i>           | rectum                    | OR223169                 |
|                                         | CoVNJ33         | β-CoV | Gongshan County-Nujiang Prefecture-Yunnan Province-China(wild bush areas)   | 1-Aug-22        | <i>Apodemus ilex</i>           | rectum                    | OR223170                 |
|                                         | CoVNJ52         | α-CoV | Lushui City-Nujiang Prefecture-Yunnan Province-China(wild bush areas)       | 21-Jul-22       | <i>Eothenomys cachinus</i>     | rectum                    | OR223171                 |
|                                         | CoVNJ53         | β-CoV | Gongshan County-Nujiang Prefecture-Yunnan Province-China(wild bush areas)   | 1-Aug-22        | <i>Apodemus ilex</i>           | rectum                    | OR223172                 |
|                                         | CoVNJ55         | β-CoV | Gongshan County-Nujiang Prefecture-Yunnan Province-China(wild bush areas)   | 1-Aug-22        | <i>Apodemus ilex</i>           | rectum                    | OR223173                 |
|                                         | CoVNJ56         | β-CoV | Gongshan County-Nujiang Prefecture-Yunnan Province-China(wild bush areas)   | 1-Aug-22        | <i>Apodemus ilex</i>           | rectum                    | OR223174                 |
|                                         | CoVNJ99         | β-CoV | Gongshan County-Nujiang Prefecture-Yunnan Province-China(wild bush areas)   | 2-Aug-22        | <i>Eothenomys cachinus</i>     | rectum                    | OR223175                 |
|                                         | CoVNJ135        | α-CoV | Gongshan County-Nujiang Prefecture-Yunnan Province-China(wild bush areas)   | 2-Aug-22        | <i>Episoriculus leucops</i>    | rectum                    | OR223176                 |
|                                         | CoVNJ142        | β-CoV | Gongshan County-Nujiang Prefecture-Yunnan Province-China(wild bush areas)   | 2-Aug-22        | <i>Eothenomys cachinus</i>     | rectum                    | OR223177                 |
|                                         | CoVNJ195        | α-CoV | Gongshan County-Nujiang Prefecture-Yunnan Province-China(residential areas) | 6-Aug-22        | <i>Rattus nitidus</i>          | rectum                    | OR223178                 |
|                                         | CoVNJ196        | α-CoV | Gongshan County-Nujiang Prefecture-Yunnan Province-China(residential areas) | 6-Aug-22        | <i>Rattus nitidus</i>          | rectum                    | OR223179                 |
|                                         | CoVNJ207        | α-CoV | Gongshan County-Nujiang Prefecture-Yunnan Province-China(residential areas) | 6-Aug-22        | <i>Rattus nitidus</i>          | rectum                    | OR223180                 |
| reference strains                       | Lijiang-41      | β-CoV | Lijiang City-Yunnan Province-China                                          | 2015            | <i>Apodemus latronum</i>       | -                         | MT820628                 |
|                                         | Lijiang-53      | β-CoV | Lijiang City-Yunnan Province-China                                          | 2014            | <i>Apodemus chevrieri</i>      | -                         | MT820629                 |
|                                         | Ruili-874       | β-CoV | Ruili City-Yunnan Province-China                                            | 2014            | <i>Rattus tanezumi</i>         | -                         | MT820631                 |
|                                         | RtAp/SAX2015    | β-CoV | Shanxi Province-China                                                       | Jun-15          | <i>Apodemus peninsulae</i>     | -                         | KY370064                 |
|                                         | BOV-36/IND/2015 | β-CoV | India                                                                       | 2015            | <i>bovine</i>                  | feces                     | MH753496                 |
|                                         | DcCoV-HKU23     | β-CoV | Morocco                                                                     | 4-Apr-16        | <i>Camelus dromedarius</i>     | Nasal swab                | MN514976                 |
|                                         | RtRI/FJ2015     | α-CoV | Fujian Province-China                                                       | 15-May          | <i>Rattus losea</i>            | pharyngeal and anal swabs | KY370050                 |
|                                         | RtClan/GZ2015   | α-CoV | Guizhou Province-China                                                      | 15-Dec          | <i>Eothenomys melanogaster</i> | pharyngeal and anal swabs | KY370054                 |
