# Supplementary material for: Detection of Alpha- and Betacoronaviruses in Small Mammals in Western Yunnan Province, China
Source: MDPI journal article supplement (doi:10.3390/v15091965), 2023-09-20
Supplement: s1 [file s1]

**Table S3.** Intra group repeatability test results.

|               | Number of<br>copies/(copies/ $\mu$ L) | Ct values |       |       | Mean Ct | SD   | CV, % |
|---------------|---------------------------------------|-----------|-------|-------|---------|------|-------|
|               |                                       | 1         | 2     | 3     |         |      |       |
| $\alpha$ -CoV | 1.00 $\times$ 10 <sup>9</sup>         | 14.70     | 14.75 | 14.63 | 14.69   | 0.06 | 0.41  |
|               | 1.00 $\times$ 10 <sup>8</sup>         | 17.90     | 17.78 | 17.83 | 17.84   | 0.06 | 0.33  |
|               | 1.00 $\times$ 10 <sup>7</sup>         | 20.96     | 20.79 | 20.98 | 20.91   | 0.10 | 0.49  |
|               | 1.00 $\times$ 10 <sup>6</sup>         | 23.70     | 23.67 | 23.59 | 23.65   | 0.06 | 0.26  |
|               | 1.00 $\times$ 10 <sup>5</sup>         | 27.44     | 27.49 | 27.21 | 27.38   | 0.30 | 1.09  |
|               | 1.00 $\times$ 10 <sup>4</sup>         | 31.15     | 30.70 | 30.72 | 31.03   | 0.24 | 0.78  |
| $\beta$ -CoV  | 1.00 $\times$ 10 <sup>9</sup>         | 13.15     | 13.31 | 13.14 | 13.2    | 0.1  | 0.74  |
|               | 1.00 $\times$ 10 <sup>8</sup>         | 16.99     | 16.83 | 16.97 | 16.93   | 0.09 | 0.52  |
|               | 1.00 $\times$ 10 <sup>7</sup>         | 20.53     | 20.05 | 20.09 | 20.22   | 0.27 | 1.33  |
|               | 1.00 $\times$ 10 <sup>6</sup>         | 23.03     | 23.75 | 23.15 | 23.31   | 0.39 | 1.66  |
|               | 1.00 $\times$ 10 <sup>5</sup>         | 27.11     | 27.14 | 27.60 | 27.28   | 0.27 | 1.00  |
|               | 1.00 $\times$ 10 <sup>4</sup>         | 30.59     | 30.53 | 30.63 | 30.58   | 0.05 | 0.16  |
