# Supplementary material for: Detection of Alpha- and Betacoronaviruses in Small Mammals in Western Yunnan Province, China
Source: MDPI journal article supplement (doi:10.3390/v15091965), 2023-09-20
Supplement: s1 [file s1]

**Table S4.** Inter group repeatability test results.

|               | Number of<br>copies/(copies/ $\mu$ L) | Ct values |       |       | Mean Ct | SD   | CV, % |
|---------------|---------------------------------------|-----------|-------|-------|---------|------|-------|
|               |                                       | 1         | 2     | 3     |         |      |       |
| $\alpha$ -CoV | 1.00 $\times$ 10 <sup>9</sup>         | 14.58     | 14.33 | 14.35 | 14.42   | 0.14 | 0.96  |
|               | 1.00 $\times$ 10 <sup>8</sup>         | 15.33     | 15.38 | 15.57 | 15.42   | 0.13 | 0.81  |
|               | 1.00 $\times$ 10 <sup>7</sup>         | 19.30     | 19.01 | 19.19 | 19.17   | 0.15 | 0.78  |
|               | 1.00 $\times$ 10 <sup>6</sup>         | 22.38     | 22.37 | 22.36 | 22.37   | 0.01 | 0.03  |
|               | 1.00 $\times$ 10 <sup>5</sup>         | 25.93     | 25.90 | 25.89 | 25.83   | 0.02 | 0.07  |
|               | 1.00 $\times$ 10 <sup>4</sup>         | 34.45     | 34.15 | 34.39 | 34.33   | 0.16 | 0.46  |
| $\beta$ -CoV  | 1.00 $\times$ 10 <sup>9</sup>         | 14.98     | 14.91 | 14.91 | 14.93   | 0.04 | 0.28  |
|               | 1.00 $\times$ 10 <sup>8</sup>         | 16.62     | 16.74 | 16.66 | 16.67   | 0.06 | 0.38  |
|               | 1.00 $\times$ 10 <sup>7</sup>         | 18.92     | 18.74 | 18.74 | 18.8    | 0.1  | 0.55  |
|               | 1.00 $\times$ 10 <sup>6</sup>         | 23.46     | 23.54 | 23.56 | 23.52   | 0.05 | 0.22  |
|               | 1.00 $\times$ 10 <sup>5</sup>         | 27.22     | 26.57 | 26.30 | 26.7    | 0.47 | 1.77  |
|               | 1.00 $\times$ 10 <sup>4</sup>         | 32.26     | 31.50 | 31.87 | 31.88   | 0.38 | 1.19  |
